# Supplementary material
Source: publisher figshare collection journal article supplement (https://acs.figshare.com/ndownloader/files/7619074)
Supplement: Supplementary file 1 [file 7619074]

*Supporting Information*  
*for*  
*Inorg. Chem.*

**A mixed-cluster approach for building a highly porous  
Co(II)-isonicotinic acid framework: gas sorption properties and  
computational analyses**

Di-Ming Chen, Nan-Nan Zhang, Chun-Sen Liu\*, Zhi-Hao Jiang, Xing-Dong Wang  
and Miao Du\*

ZhengZhou University of Light Industry, Henan Provincial Key Lab of Surface &  
Interface Science, Zhengzhou, Henan 450002, China, P. R.

E-mail: [chunsenliu@zzuli.edu.cn](mailto:chunsenliu@zzuli.edu.cn); [dumiao@public.tpt.tj.cn](mailto:dumiao@public.tpt.tj.cn)

## Experimental Section

**Materials and Methods.** All the chemicals purchased were of reagent grade and used without further purification. Analyses for C, H, and N were carried out on a Perkin-Elmer 240 CHN elemental analyzer. Powder X-ray diffraction measurements were recorded on a Rigaku D/Max-2500 X-ray diffractometer using Cu K $\alpha$  radiation. TGA were performed on a Labsys NETZSCH TG 209 Setaram apparatus with a heating rate of 10 °C/min in nitrogen atmosphere. The gas sorption isotherms were collected on a Micromeritics 3Flex surface area and pore size analyzer under ultrahigh vacuum in a clean system, with a diaphragm and turbo pumping system. Ultrahigh-purity-grade (> 99.999%) N<sub>2</sub>, CO<sub>2</sub> and H<sub>2</sub> gases were applied in all measurements. The experimental temperatures were maintained by liquid nitrogen (77 K) and temperature-programmed water bath (273 and 293 K).

**Synthesis of (H<sub>2</sub>N(CH<sub>3</sub>)<sub>2</sub>)[Co<sub>8</sub>( $\mu$ <sub>2</sub>-OH)<sub>4</sub>( $\mu$ <sub>3</sub>-OH)<sub>4</sub>( $\mu$ <sub>4</sub>-OH)(Ina)<sub>8</sub>](H<sub>2</sub>O)<sub>15</sub>(DMA)<sub>9</sub> (1).** A mixture of Hina (9.5 mg, 0.05 mmol), CoCl<sub>2</sub>·6H<sub>2</sub>O (36 mg, 0.15 mmol) was dissolved in a mixed solvent of DMA (2.5 mL) and H<sub>2</sub>O (0.5 mL) solution in a screw-capped vial. After addition of HBF<sub>4</sub> (37%, aq, 0.5 mL), the vial was heated at 120 °C for 72 h under autogenous pressure. Red crystals were obtained after filtration, washed with DMA. Yield: 34% based on the Hina ligand. Elemental analysis (calcd)found for **1**: C<sub>86</sub>H<sub>160</sub>Co<sub>8</sub>N<sub>18</sub>O<sub>49</sub>: C, (38.56)38.23; H, (6.11)5.97; N, (9.48)9.33. Elemental analysis (calcd)found for activated **1**: C, (36.45)36.19; H, (3.00)3.32; N, (7.65)7.88. IR (KBr disks, selected bands, cm<sup>-1</sup>): 3388m, 3116w, 1615s, 1558s, 1401s, 1317m, 1185s, 1077s, 835m, 775s, 632s.

**X-ray Single Crystal Analysis.** Data was collected on an Agilent Technologies SuperNova Single Crystal Diffractometer at low temperature equipped with graphite-monochromatic Mo K $\alpha$

radiation ( $\lambda = 0.71073 \text{ \AA}$ ). The structure of **1** was solved by SHELXS (direct methods) and refined by SHELXL (full matrix least-squares techniques) in the Olex2 package. All non-hydrogen atoms were refined with anisotropic displacement parameters. Hydrogen atoms attached to carbon were placed in geometrically idealized positions and refined using a riding model. For the highly disordered nature of the solvents, they could not be finely made out in the refinement, so the SQUEEZE routine of PLATON was applied to remove the diffraction contributed from the highly disordered guest molecules.<sup>2</sup> The chemical formula of **1** was determined by the combination of the crystal data, TGA, and elemental analysis.

**GCMC Simulation Methodology** Grand canonical Monte Carlo (GCMC) simulations were performed for the adsorption of H<sub>2</sub> in **1** by the Sorption module of Material Studio according to the reference.<sup>3</sup> The framework and gas molecules were considered to be rigid. Before the simulation, the H<sub>2</sub>N(CH<sub>3</sub>)<sub>2</sub> ion was manually built and geometry optimization using the VAMP module with MNDO/d function, then the H<sub>2</sub>N(CH<sub>3</sub>)<sub>2</sub> ion was put into the framework of **1** via the Locate task to make the framework neutral. The H<sub>2</sub> molecule was modeled as a two-site rigid molecule with H-H bond length of 0.74 Å. The partial charges for atoms of **1** were derived from QEq method and QEq\_neutral1.0 parameter. One unit cells were used during the simulations. All parameters for gas molecules and atoms of **1** were modeled with the universal forcefield (UFF) embedded in the MS modeling package. Simulation of H<sub>2</sub> uptake for **1a** was performed with Fixed loading task in MS. The Maximum loading steps was set to 2000000, Equilibration steps were set to 2000000, and production steps were set to 2000000, temperature were set to 77 K. The favorable bonding sites between H<sub>2</sub> and the MOF was simulated by using the Locate task.

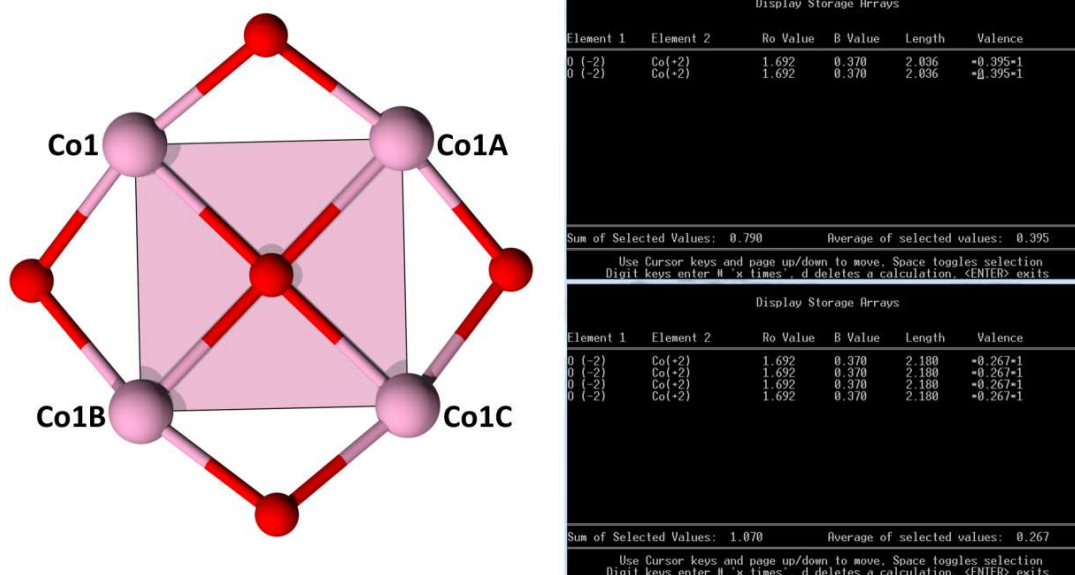

**Figure S1.** The planar  $\text{Co}_4(\mu_4\text{-OH})(\mu_2\text{-OH})_4$  cluster in **1** and the BVS calculation results.

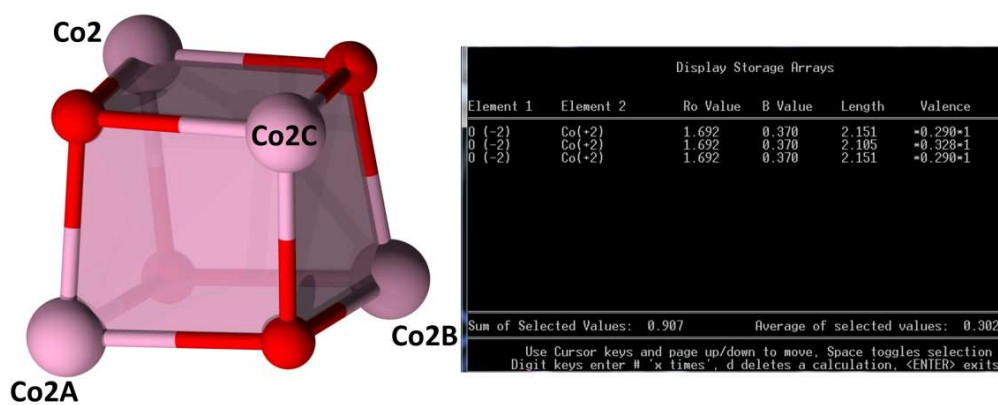

**Figure S2.** The cuboidal  $\text{Co}_4(\mu_3\text{-OH})_4$  cluster in **1** and the BVS calculation results.

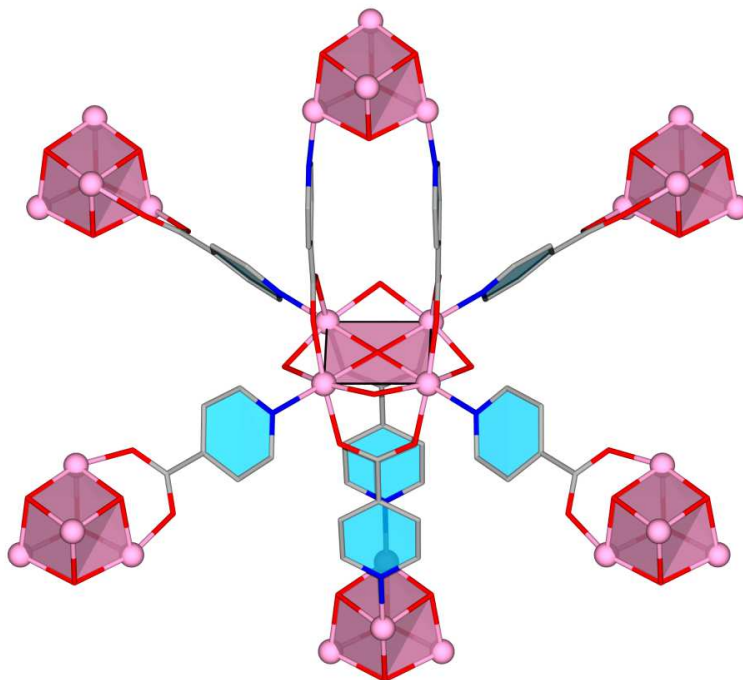

**Figure S3.** The representation for six-connected  $\text{Co}_4(\mu_4\text{-OH})(\mu_2\text{-OH})_4$  cluster.

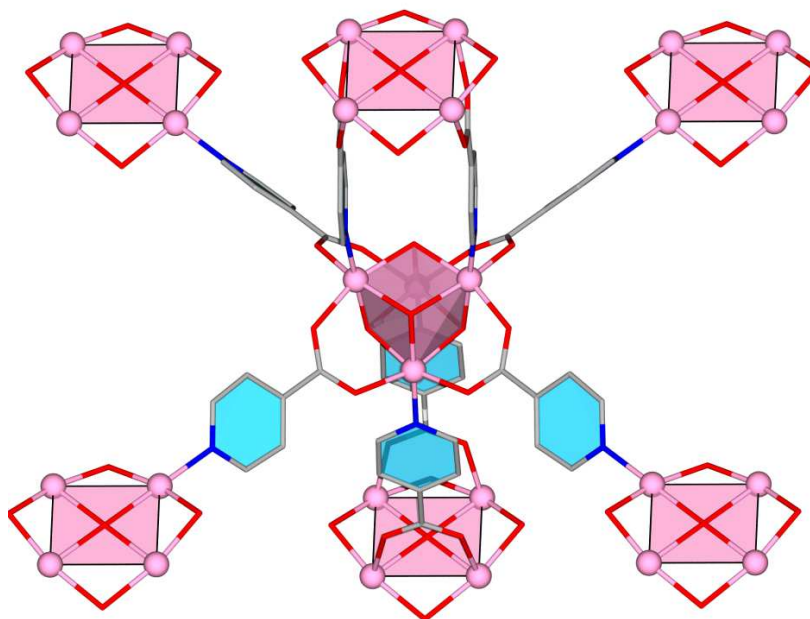

**Figure S4.** The representation for six-connected  $\text{Co}_4(\mu_3\text{-OH})_4$  cluster.

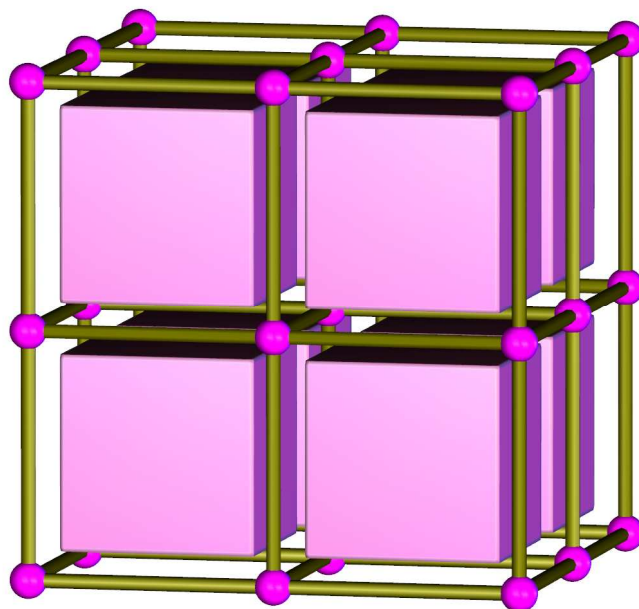

**Figure S5.** Natural tiling of **1**.

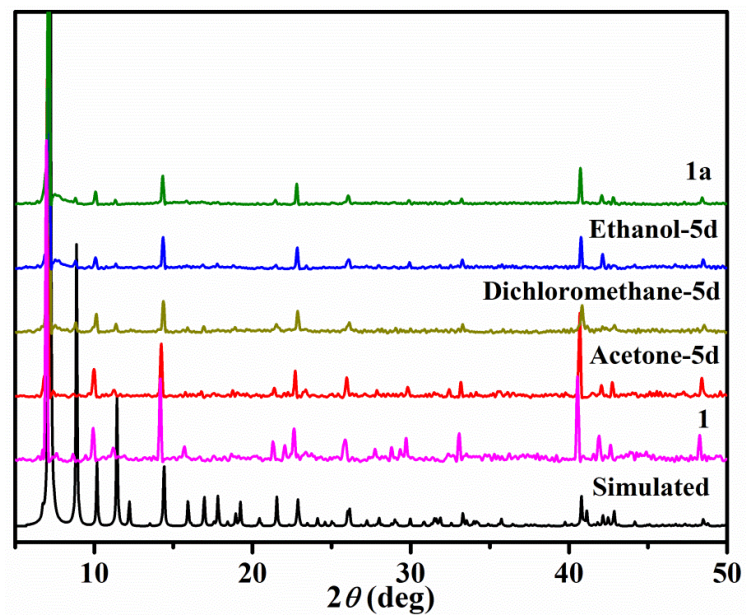

**Figure S6.** The PXRD patterns of **1** in different solvents.

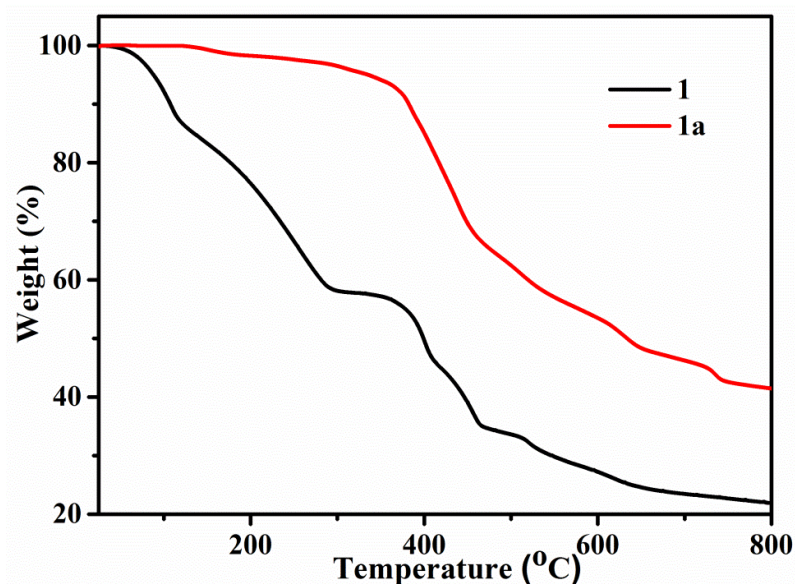

**Figure S7.** TGA curves for **1** and **1a**.

**Analysis of H<sub>2</sub> and CO<sub>2</sub> Adsorption Isotherms using Virial fitting:**

$$\ln P = \ln N + 1/T \sum_{i=0}^m a_i N^i + \sum_{i=0}^n b_i N^i \quad Q_{st} = -R \sum_{i=0}^m a_i N^i$$

The above virial expression was used to fit the combined isotherm data for **1a** at 273, 283 and 298 K, where P is the pressure, N is the adsorbed amount, T is the temperature, a<sub>i</sub> and b<sub>i</sub> are virial coefficients, and m and N are the number of coefficients used to describe the isotherms. Q<sub>st</sub> is the coverage-dependent enthalpy of adsorption and R is the universal gas constant.

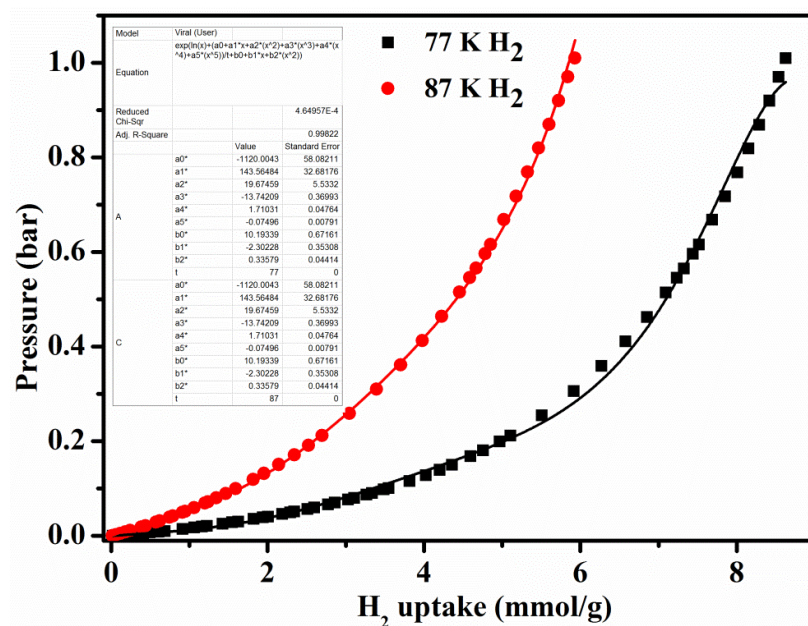

Figure S8. The virial fits for the H<sub>2</sub> sorption isotherms at 77 K and 87 K.

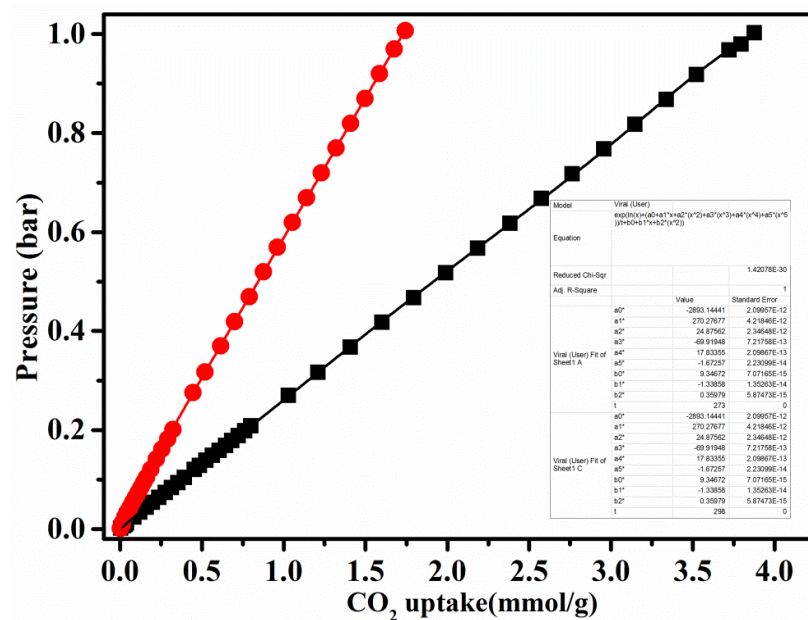

Figure S9. The virial fits for the CO<sub>2</sub> sorption isotherms at 273 K and 283 K.

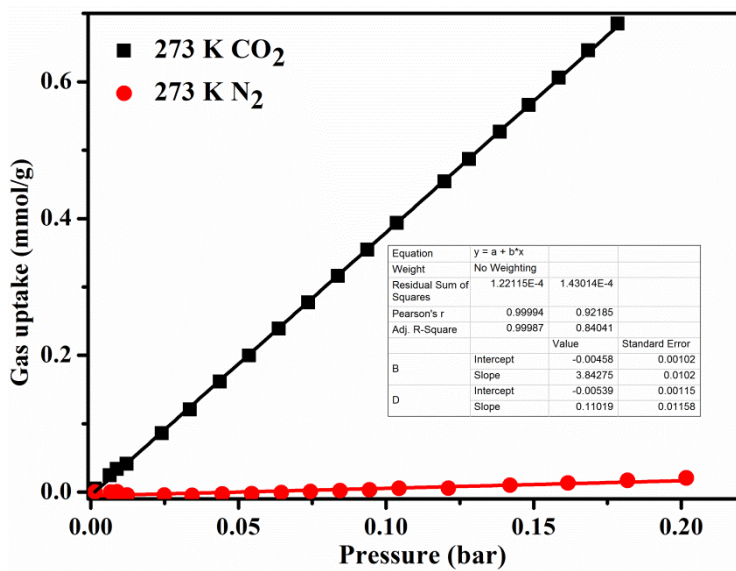

(a)

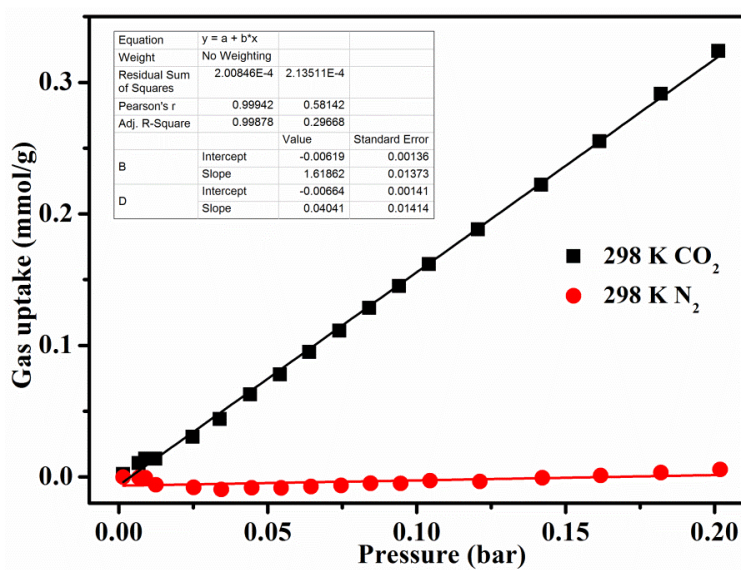

(b)

**Figure S10.** Linear fitting of the low-pressure region of CO<sub>2</sub> and N<sub>2</sub> adsorption isotherms measured at 298 K.

**Table S1.** Comparison of surface area and H<sub>2</sub> adsorption capacities in selected isonicotinic acid-based MOFs.

| Material                                                                                                                                                   | Surface Area<br>(m <sup>2</sup> /g) |          | Pore<br>Volume<br>cm <sup>3</sup> /g | H <sub>2</sub><br>Uptake<br>wt% | H <sub>2</sub> Q <sub>st</sub><br>kJ/mol | Ref.             |
|------------------------------------------------------------------------------------------------------------------------------------------------------------|-------------------------------------|----------|--------------------------------------|---------------------------------|------------------------------------------|------------------|
|                                                                                                                                                            | BET                                 | Langmuir |                                      |                                 |                                          |                  |
| <b>1a</b>                                                                                                                                                  | 1500                                | 1667     | 0.621                                | 1.71                            | 9.2                                      | <b>This work</b> |
| MCF-38                                                                                                                                                     |                                     | 544      | 0.2                                  | 1.9                             | 7.4                                      | 1                |
| MCF-39                                                                                                                                                     | -                                   | -        | -                                    | -                               | -                                        | 2                |
| MCF-40                                                                                                                                                     | 452                                 | 547      | 0.23                                 | 1.33                            | 7.4                                      | 3                |
| MCF-41                                                                                                                                                     | 834                                 | 917      | 0.38                                 | 1.54                            | 6.8                                      | 3                |
| Co <sub>9</sub> (Ina) <sub>18</sub> (μ <sub>2</sub> -OH <sub>2</sub> ) <sub>4</sub> (H <sub>2</sub> O) <sub>2</sub> (guest)                                | 600                                 | 835      | 0.314                                | 1.40                            | 6.45                                     | 4                |
| Co <sub>9</sub> (INA) <sub>18</sub> (H <sub>2</sub> O) <sub>6</sub> ]·11DMF·15H <sub>2</sub> O                                                             | 910                                 | 1016     | 0.39                                 | 1.5                             | 6.3                                      | 5                |
| [Co <sub>8</sub> (OH)(ina) <sub>8</sub> (N <sub>3</sub> ) <sub>8</sub> X]                                                                                  | 482                                 | 738      |                                      | 0.71                            |                                          | 6                |
| Co <sub>8</sub> (μ <sub>4</sub> -O)(μ <sub>3</sub> -OH) <sub>4</sub> (μ-H <sub>2</sub> O) <sub>4</sub> (ina) <sub>8</sub> ](NO <sub>3</sub> ) <sub>2</sub> |                                     | 459      |                                      | 1.1                             | 7.4                                      | 7                |
| [CuIn(ina) <sub>4</sub> ] <sub>2</sub> (DMF)                                                                                                               | 175                                 | 244      |                                      |                                 |                                          | 8                |
| Co-FINA-1 (FINA = F-substituent INA )                                                                                                                      | 547.3                               | 841.6    |                                      | 1.97                            |                                          | 9                |
| Co-FINA-2                                                                                                                                                  | 152.8                               | 238.3    |                                      | 0.82                            |                                          | 9                |
| {[Co <sub>6</sub> (μ <sub>3</sub> -OH) <sub>4</sub> (Ina) <sub>8</sub> ](H <sub>2</sub> O) <sub>10</sub> (DMA) <sub>2</sub> ] <sub>n</sub> }               | 631                                 | 739      | 0.267                                | 1.25                            |                                          | 10               |

- Chen, Q.; Lin, J.-B.; Xue, W.; Zeng, M.-H.; Chen, X.-M. A Porous Coordination Polymer Assembled from 8-Connected {Co(II)<sub>3</sub>(OH)} Clusters and Isonicotinate: Multiple Active Metal Sites, Apical Ligand Substitution, H<sub>2</sub> Adsorption, and Magnetism. *Inorg. Chem.* **2011**, *50*, 2321–2328.
- Chen, Q.; Xue, W.; Wang, B.-Y.; Zeng, M.-H.; Chen, X.-M. Unprecedented Binodal (7,9)-Connected Network Based on Distinct Tricobalt(ii) Clusters: Structure, Topology and Cooperative Magnetism. *CrystEngComm.* **2012**, *14*, 2009–2014.
- Chen, Q.; Xue, W.; Lin, J.-B.; Lin, R.-B.; Zeng, M.-H.; Chen, X.-M. Highly-Connected, Porous Coordination Polymers Based on [M<sub>4</sub>(μ<sub>3</sub>-OH)<sub>2</sub>] (M = Co(II) and Ni(II)) Clusters: Different Networks, Adsorption and Magnetic Properties. *Dalton Trans.* **2012**, *41*, 4199–4206.
- Kang, Y.; Wang, F. A Highly-Connected Metal–organic Framework Based on [Co<sub>2</sub>(μ<sub>2</sub>-OH<sub>2</sub>)] Units and Mononuclear Co Centers with High Gas Uptake Capacity. *CrystEngComm.* **2014**, *16*, 4088–4090.
- Moushi, E. E.; Kourtellaris, A.; Spanopoulos, I.; Manos, M. J.; Papaefstathiou, G. S.; Trikalitis, P. N.; Tasiopoulos, A. J. A Microporous Co<sup>2+</sup> Metal Organic Framework with Single-Crystal to Single-Crystal Transformation Properties and High CO<sub>2</sub> Uptake. *Cryst. Growth Des.* **2015**, *15*, 185–193.
- Chen, X.; Li, Z.; Wei, R.; Li, B.; Zhang, T.; Tao, J. Template Controlled Synthesis of Cluster-Based Porous Coordination Polymers: Crystal Structure, Magnetism and Adsorption. *New J. Chem.* **2015**, *39*, 7333–7339.
- Chen, Q.; Xue, W.; Lin, J.-B.; Wei, Y.-S.; Yin, Z.; Zeng, M.-H.; Kurmoo, M.; Chen, X.-M.

- Inside Back Cover: Windmill  $\text{Co}_4\{\text{Co}_4(\mu_4\text{-O})\}$  with 16 Divergent Branches Forming a Family of Metal-Organic Frameworks: Organic Metrics Control Topology, Gas Sorption, and Magnetism. *Chem. - A Eur. J.* **2016**, *22*, 12199–12199.
8. Tan, Y.-X.; He, Y.-P.; Wang, M.; Zhang, J. A Water-Stable Zeolite-like Metal–organic Framework for Selective Separation of Organic Dyes. *RSC Adv.* **2014**, *4*, 1480–1483.
  9. Pachfule, P.; Chen, Y.; Jiang, J.; Banerjee, R. Fluorinated Metal-Organic Frameworks: Advantageous for Higher  $\text{H}_2$  and  $\text{CO}_2$  Adsorption or Not? *Chem. - A Eur. J.* **2012**, *18*, 688–694.
  10. Chen, D.-M.; Tian, J.-Y.; Liu, C.-S.; Du, M. A Co II -Based Metal–organic Framework Based on  $[\text{Co}_6(\mu_3\text{-OH})_4]$  Units Exhibiting Selective Sorption of  $\text{C}_2\text{H}_2$  over  $\text{CO}_2$  and  $\text{CH}_4$ . *CrystEngComm.* **2016**, *18*, 3760–3763.

**Table S2.** Crystal data and structure refinement for **1**.

|                                             |                                                                                |
|---------------------------------------------|--------------------------------------------------------------------------------|
| Empirical formula                           | C <sub>48</sub> H <sub>32</sub> Co <sub>8</sub> N <sub>8</sub> O <sub>25</sub> |
| Formula weight                              | 1592.25                                                                        |
| Temperature/K                               | 293(2)                                                                         |
| Crystal system                              | tetragonal                                                                     |
| Space group                                 | I-4m2                                                                          |
| a/Å                                         | 17.3699(10)                                                                    |
| b/Å                                         | 17.3699(10)                                                                    |
| c/Å                                         | 19.8944(12)                                                                    |
| $\alpha$ /°                                 | 90                                                                             |
| $\beta$ /°                                  | 90                                                                             |
| $\gamma$ /°                                 | 90                                                                             |
| Volume/Å <sup>3</sup>                       | 6002.4(8)                                                                      |
| Z                                           | 2                                                                              |
| $\rho_{\text{calc}}$ /cm <sup>3</sup>       | 0.881                                                                          |
| $\mu$ /mm <sup>-1</sup>                     | 1.120                                                                          |
| F(000)                                      | 1584.0                                                                         |
| Radiation                                   | MoK $\alpha$ ( $\lambda$ = 0.71073)                                            |
| 2 $\Theta$ range for data collection/°      | 7.33 to 49.978                                                                 |
| Reflections collected                       | 9679                                                                           |
| Independent reflections                     | 2825 [ $R_{\text{int}}$ = 0.0714, $R_{\text{sigma}}$ = 0.0815]                 |
| Data/restraints/parameters                  | 2825/84/132                                                                    |
| Goodness-of-fit on F <sup>2</sup>           | 0.997                                                                          |
| Final R indexes [ $I \geq 2\sigma(I)$ ]     | $R_1$ = 0.0675, $wR_2$ = 0.1700                                                |
| Final R indexes [all data]                  | $R_1$ = 0.0860, $wR_2$ = 0.1823                                                |
| Largest diff. peak/hole / e Å <sup>-3</sup> | 1.94/-0.62                                                                     |
| Flack parameter                             | 0.46(3)                                                                        |

**Table S3.** Bond Lengths for **1**.

| Atom | Atom             | Length/Å   | Atom | Atom              | Length/Å  |
|------|------------------|------------|------|-------------------|-----------|
| Co1  | O1               | 2.1803(15) | N2   | Co1 <sup>9</sup>  | 2.093(11) |
| Co1  | O2 <sup>1</sup>  | 2.035(5)   | N2   | C8                | 1.330(19) |
| Co1  | O2               | 2.035(5)   | N2   | C8 <sup>10</sup>  | 1.330(19) |
| Co1  | O3               | 2.064(6)   | N2   | C10 <sup>10</sup> | 1.37(3)   |
| Co1  | O3 <sup>2</sup>  | 2.064(6)   | N2   | C10               | 1.37(3)   |
| Co1  | N2 <sup>3</sup>  | 2.093(11)  | N1   | C4 <sup>6</sup>   | 1.317(11) |
| Co2  | O4               | 2.104(6)   | N1   | C4                | 1.317(11) |
| Co2  | O4 <sup>4</sup>  | 2.150(4)   | C2   | C1                | 1.486(15) |
| Co2  | O4 <sup>5</sup>  | 2.150(4)   | C2   | C3                | 1.341(12) |
| Co2  | O5 <sup>6</sup>  | 2.041(6)   | C2   | C3 <sup>6</sup>   | 1.341(12) |
| Co2  | O5               | 2.041(6)   | C6   | C5                | 1.480(16) |
| Co2  | N1               | 2.075(9)   | C6   | C7                | 1.40(2)   |
| O4   | Co2 <sup>5</sup> | 2.151(4)   | C6   | C7 <sup>10</sup>  | 1.40(2)   |
| O4   | Co2 <sup>4</sup> | 2.151(4)   | C6   | C9                | 1.39(3)   |
| O1   | Co1 <sup>7</sup> | 2.1803(15) | C6   | C9 <sup>10</sup>  | 1.39(3)   |
| O1   | Co1 <sup>1</sup> | 2.1803(15) | C1   | O3 <sup>6</sup>   | 1.253(8)  |
| O1   | Co1 <sup>8</sup> | 2.1803(15) | C5   | O5 <sup>10</sup>  | 1.255(8)  |
| O2   | Co1 <sup>7</sup> | 2.035(5)   | C4   | C3                | 1.396(15) |
| O3   | C1               | 1.253(8)   | C7   | C8                | 1.41(2)   |
| O5   | C5               | 1.254(8)   | C10  | C9                | 1.35(4)   |

Symmetry codes: <sup>1</sup>1-Y,+X,-Z; <sup>2</sup>1-Y,1-X,-Z; <sup>3</sup>-1/2+Y,3/2-X,1/2-Z; <sup>4</sup>+Y,1-X,1-Z; <sup>5</sup>1-Y,+X,1-Z; <sup>6</sup>1-X,+Y,+Z; <sup>7</sup>+Y,1-X,-Z;  
<sup>8</sup>1-X,1-Y,+Z; <sup>9</sup>3/2-Y,1/2+X,1/2-Z; <sup>10</sup>+Y,+X,1-Z.

**Table S4.** Bond Angles for **1**.

| Atom             | Atom | Atom             | Angle/°   | Atom              | Atom | Atom              | Angle/°   |
|------------------|------|------------------|-----------|-------------------|------|-------------------|-----------|
| O2 <sup>1</sup>  | Co1  | O1               | 83.71(16) | Co1 <sup>1</sup>  | O1   | Co1 <sup>8</sup>  | 180.00(4) |
| O2               | Co1  | O1               | 83.71(16) | Co1               | O1   | Co1 <sup>8</sup>  | 90.0      |
| O2               | Co1  | O2 <sup>1</sup>  | 167.4(3)  | Co1               | O1   | Co1 <sup>7</sup>  | 180.0     |
| O2               | Co1  | O3               | 90.1(3)   | Co1               | O2   | Co1 <sup>8</sup>  | 98.5(3)   |
| O2 <sup>1</sup>  | Co1  | O3               | 89.2(3)   | C1                | O3   | Co1               | 129.1(6)  |
| O2               | Co1  | O3 <sup>2</sup>  | 89.2(3)   | C5                | O5   | Co2               | 129.3(6)  |
| O2 <sup>1</sup>  | Co1  | O3 <sup>2</sup>  | 90.1(3)   | C8                | N2   | Co1 <sup>9</sup>  | 120.8(9)  |
| O2 <sup>1</sup>  | Co1  | N2 <sup>3</sup>  | 96.29(16) | C8 <sup>10</sup>  | N2   | Co1 <sup>9</sup>  | 120.8(9)  |
| O2               | Co1  | N2 <sup>3</sup>  | 96.29(16) | C8 <sup>10</sup>  | N2   | C8                | 118.5(18) |
| O3 <sup>2</sup>  | Co1  | O1               | 87.2(2)   | C10               | N2   | Co1 <sup>9</sup>  | 123.3(14) |
| O3               | Co1  | O1               | 87.2(2)   | C10 <sup>10</sup> | N2   | Co1 <sup>9</sup>  | 123.3(14) |
| O3               | Co1  | O3 <sup>2</sup>  | 174.4(4)  | C10               | N2   | C10 <sup>10</sup> | 113(3)    |
| O3 <sup>2</sup>  | Co1  | N2 <sup>3</sup>  | 92.8(2)   | C4 <sup>6</sup>   | N1   | Co2               | 121.9(5)  |
| O3               | Co1  | N2 <sup>3</sup>  | 92.8(2)   | C4                | N1   | Co2               | 121.9(5)  |
| N2 <sup>3</sup>  | Co1  | O1               | 180.0     | C4                | N1   | C4 <sup>6</sup>   | 115.8(11) |
| O4               | Co2  | O4 <sup>4</sup>  | 84.8(3)   | C3                | C2   | C1                | 121.2(5)  |
| O4               | Co2  | O4 <sup>5</sup>  | 84.8(3)   | C3 <sup>6</sup>   | C2   | C1                | 121.2(5)  |
| O4 <sup>5</sup>  | Co2  | O4 <sup>4</sup>  | 80.0(2)   | C3                | C2   | C3 <sup>6</sup>   | 117.6(11) |
| O5 <sup>6</sup>  | Co2  | O4               | 85.5(2)   | C7 <sup>10</sup>  | C6   | C5                | 120.8(8)  |
| O5 <sup>6</sup>  | Co2  | O4 <sup>5</sup>  | 86.2(2)   | C7                | C6   | C5                | 120.8(8)  |
| O5               | Co2  | O4 <sup>4</sup>  | 86.2(2)   | C7 <sup>10</sup>  | C6   | C7                | 118.5(17) |
| O5               | Co2  | O4               | 85.5(2)   | C9 <sup>10</sup>  | C6   | C5                | 120.4(14) |
| O5 <sup>6</sup>  | Co2  | O4 <sup>4</sup>  | 163.8(3)  | C9                | C6   | C5                | 120.4(14) |
| O5               | Co2  | O4 <sup>5</sup>  | 163.8(3)  | C9                | C6   | C9 <sup>10</sup>  | 119(3)    |
| O5 <sup>6</sup>  | Co2  | O5               | 106.1(4)  | O3                | C1   | O3 <sup>6</sup>   | 125.4(10) |
| O5               | Co2  | N1               | 95.0(3)   | O3                | C1   | C2                | 117.3(5)  |
| O5 <sup>6</sup>  | Co2  | N1               | 95.0(3)   | O3 <sup>6</sup>   | C1   | C2                | 117.3(5)  |
| N1               | Co2  | O4               | 179.1(4)  | O5                | C5   | O5 <sup>10</sup>  | 126.4(10) |
| N1               | Co2  | O4 <sup>5</sup>  | 94.5(3)   | O5                | C5   | C6                | 116.8(5)  |
| N1               | Co2  | O4 <sup>4</sup>  | 94.5(3)   | O5 <sup>10</sup>  | C5   | C6                | 116.8(5)  |
| Co2              | O4   | Co2 <sup>5</sup> | 94.3(2)   | N1                | C4   | C3                | 123.4(10) |
| Co2              | O4   | Co2 <sup>4</sup> | 94.3(2)   | C2                | C3   | C4                | 119.9(10) |
| Co2 <sup>5</sup> | O4   | Co2 <sup>4</sup> | 100.0(2)  | C6                | C7   | C8                | 118.2(16) |
| Co1 <sup>1</sup> | O1   | Co1 <sup>7</sup> | 90.0      | N2                | C8   | C7                | 123.3(17) |
| Co1 <sup>8</sup> | O1   | Co1 <sup>7</sup> | 90.0      | C9                | C10  | N2                | 125(3)    |
| Co1              | O1   | Co1 <sup>1</sup> | 90.0      | C10               | C9   | C6                | 118(3)    |

Symmetry codes: <sup>1</sup>2-X,-Y,1-Z; <sup>2</sup>1+X,+Y,+Z; <sup>3</sup>+X,1+Y,+Z; <sup>4</sup>2-X,1/2+Y,1/2-Z; <sup>5</sup>+X,-1+Y,+Z;  
<sup>6</sup>-1+X,+Y,+Z; <sup>7</sup>2-X,-1/2+Y,1/2-Z.
